# Supplementary material
Source: Springer Nature journal article supplement (https://www.springermedizin.de/resource/supplementary/12890_2014_643_MOESM3_ESM.pdf/9505540)

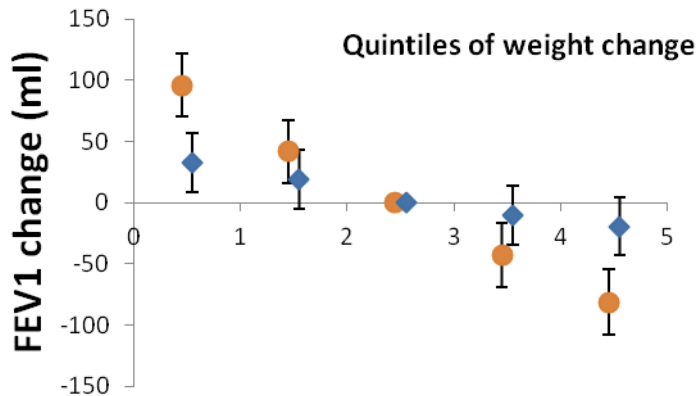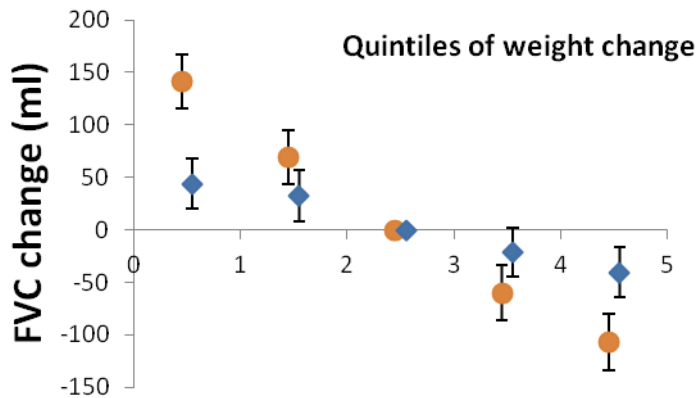

Supplement: MOESM3 [file 9505540]
